# Supplementary material for: Antigen specificity and cross-reactivity drive functionally diverse anti–Aspergillus fumigatus T cell responses in cystic fibrosis
Source: PubMed Central journal article supplement (PMC9974102; doi:10.1172/jci161593), 2023-03-01
Supplement: jci-133-161593-s138.pdf [file jci-133-161593-s138.pdf]

Supplemental Figure 1

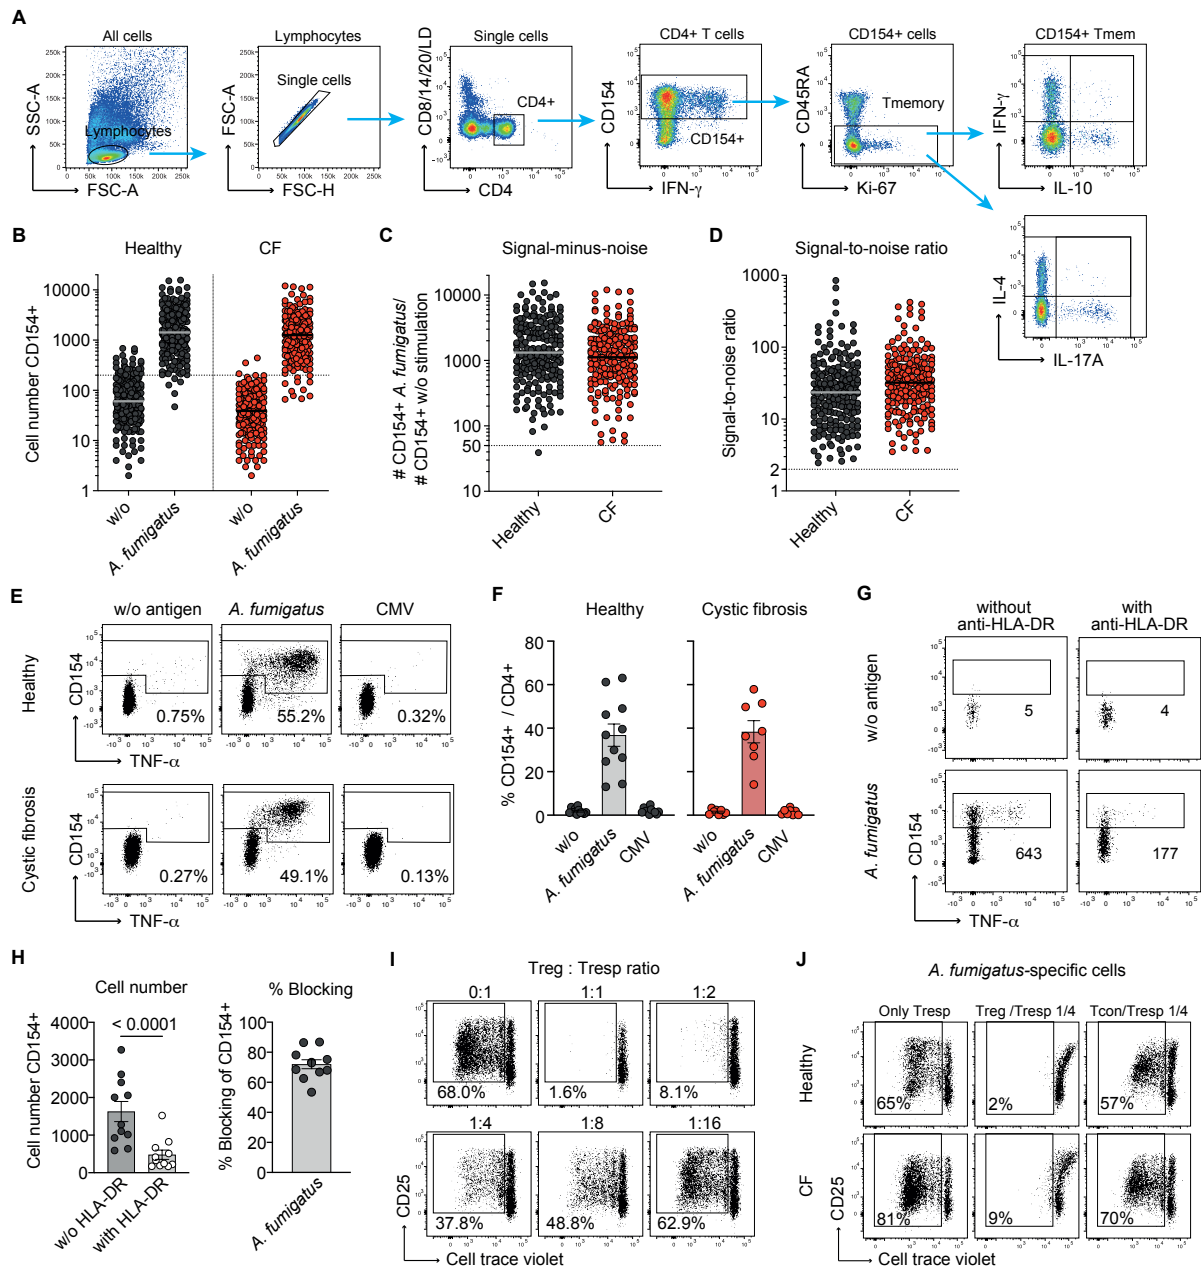

**Figure S1. Specificity of CD154 induction on CD4+ T cells following stimulation with *A. fumigatus* lysate.**

(A) Gating strategy following enrichment of CD154+ cells via ARTE. (B) Absolute cell counts of CD154+CD4+ T cells obtained by ARTE from unstimulated control or *A. fumigatus* lysate stimulated samples, respectively. (C) Signal-minus-noise numbers of enriched CD154+ cells. For each donor, background cells enriched from the non-stimulated control were subtracted and the absolute numbers of obtained *A. fumigatus*-reactive CD154+ T cells are shown. (D) Signal-to-noise ratio of CD154+ cell numbers obtained by ARTE. For each donor, the number of *A. fumigatus*-reactive CD154+ cells (signal) was divided by the number of CD154+ in the unstimulated sample (noise). (E, F) *A. fumigatus*-reactive CD154+ T cells were enriched by ARTE, FACS-purified, and expanded in vitro. (E) Representative dot plot examples for restimulation with *A. fumigatus* lysate or CMV lysate as control antigen. Flow plots are in part derived from Figure 6A. (F) summary of restimulation reactivity of healthy donors (n=11) or pwCF (n=8). (G) Stimulation of *A. fumigatus*-reactive CD154+ T cells in presence or absence of an anti-HLA-DR blocking antibody. Cell counts

after CD154+ ARTE enrichment are indicated. **(H)** Enriched cell numbers and percent inhibition of CD154 induction by anti-HLA-DR blockade in different donors (n=11). **(I)** Dot plot examples showing in vitro suppression assay with polyclonal Tregs. Ex vivo isolated Tregs were combined with proliferation dye labeled allogeneic responder CD4+ T cells (Tresp) in different Treg to Tresp ratios. Cells were stimulated polyclonally with CD3/CD28 beads. Numbers indicate percentage of Tresp proliferation. Flow plots are in part derived from Figure 2C. **(J)** Dot plot examples for the in vitro suppression assay with *A. fumigatus*-specific Tregs. Allogeneic CD4+ responder T cells (Tresp) were labeled with cell trace violet dye and stimulated polyclonally with CD3/CD28 beads. Ex vivo isolated *A. fumigatus*-reactive CD137+ Tregs or CD154+ Tcons were added at a T cell: Tresp ratio of 1:4. Numbers indicate percentage of proliferating Tresp cells. Each symbol in (B, C, D, F, H) represents one donor, horizontal lines indicate geometric mean in (B, C, D); bars and error bars indicate mean and SEM in (F, H). Statistical differences: Two-tailed paired t test in (H).

## Supplemental Figure 2

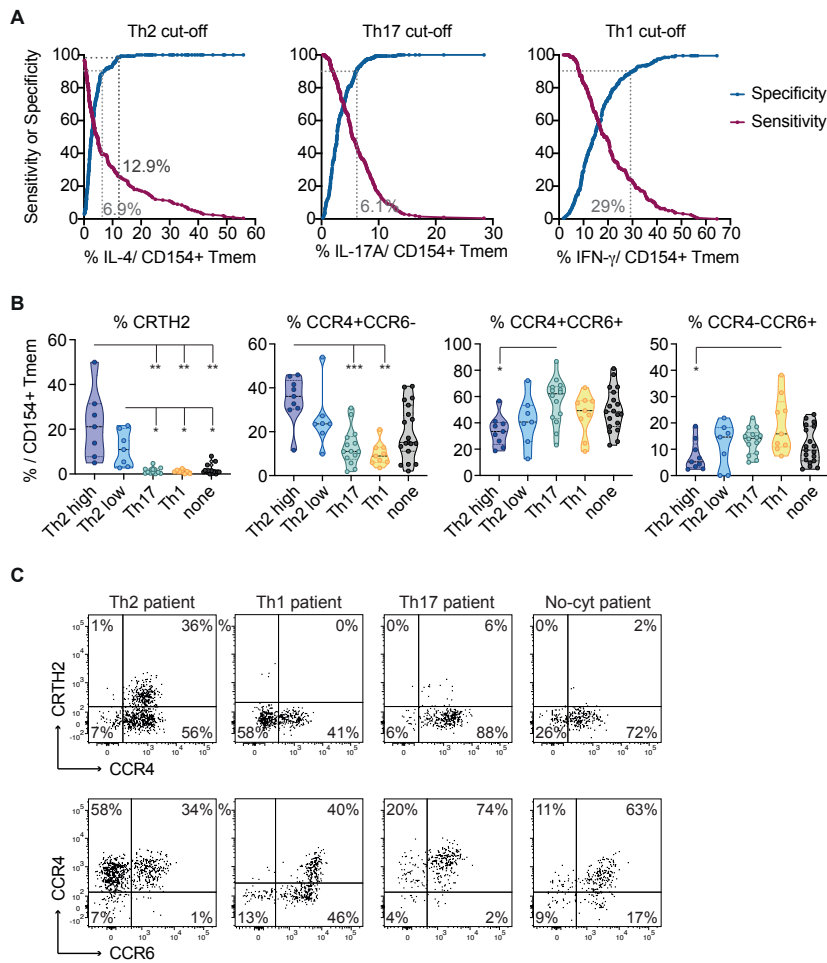

### Figure S2. Chemokine receptor pattern of *A. fumigatus*-reactive T cells in pwCF.

**(A)** Cut-off values for cytokine production of *A. fumigatus*-reactive Tmem to discriminate between healthy individuals and pwCF were calculated by receiver operating characteristic (ROC) analysis and defined to detect patients with 90% specificity. For IL-4 production, a second threshold was set at a sensitivity of 99% to identify patients with particularly high production of IL-4. The derived cut-off values were 6.9% for IL-4-low, 12.9% for IL-4-high, 6.1% for IL-17A, and 29% for IFN- $\gamma$  producing cells among CD154+ Tmem, respectively. **(B, C)** *A. fumigatus*-reactive T cells from pwCF were stained ex vivo for CRTH2, CCR4 and CCR6 expression. **(A)** Expression within the different *A. fumigatus*-specific T cell reactivity groups is shown. **(B)** Representative dot plot examples. Cells were gated on CD154+ memory cells and percentages of marker positive cells are shown.

Truncated violin plots with quartiles and range are shown in (B), each symbol represents one donor. Statistical differences: Kruskal-Wallis test with Dunn's post hoc test in (B), significant differences are indicated as \*\*\*\* $P < 0.0001$ ; \*\*\* $P < 0.001$ ; \*\* $P < 0.01$ ; \* $P < 0.05$ .

Supplemental Figure 3

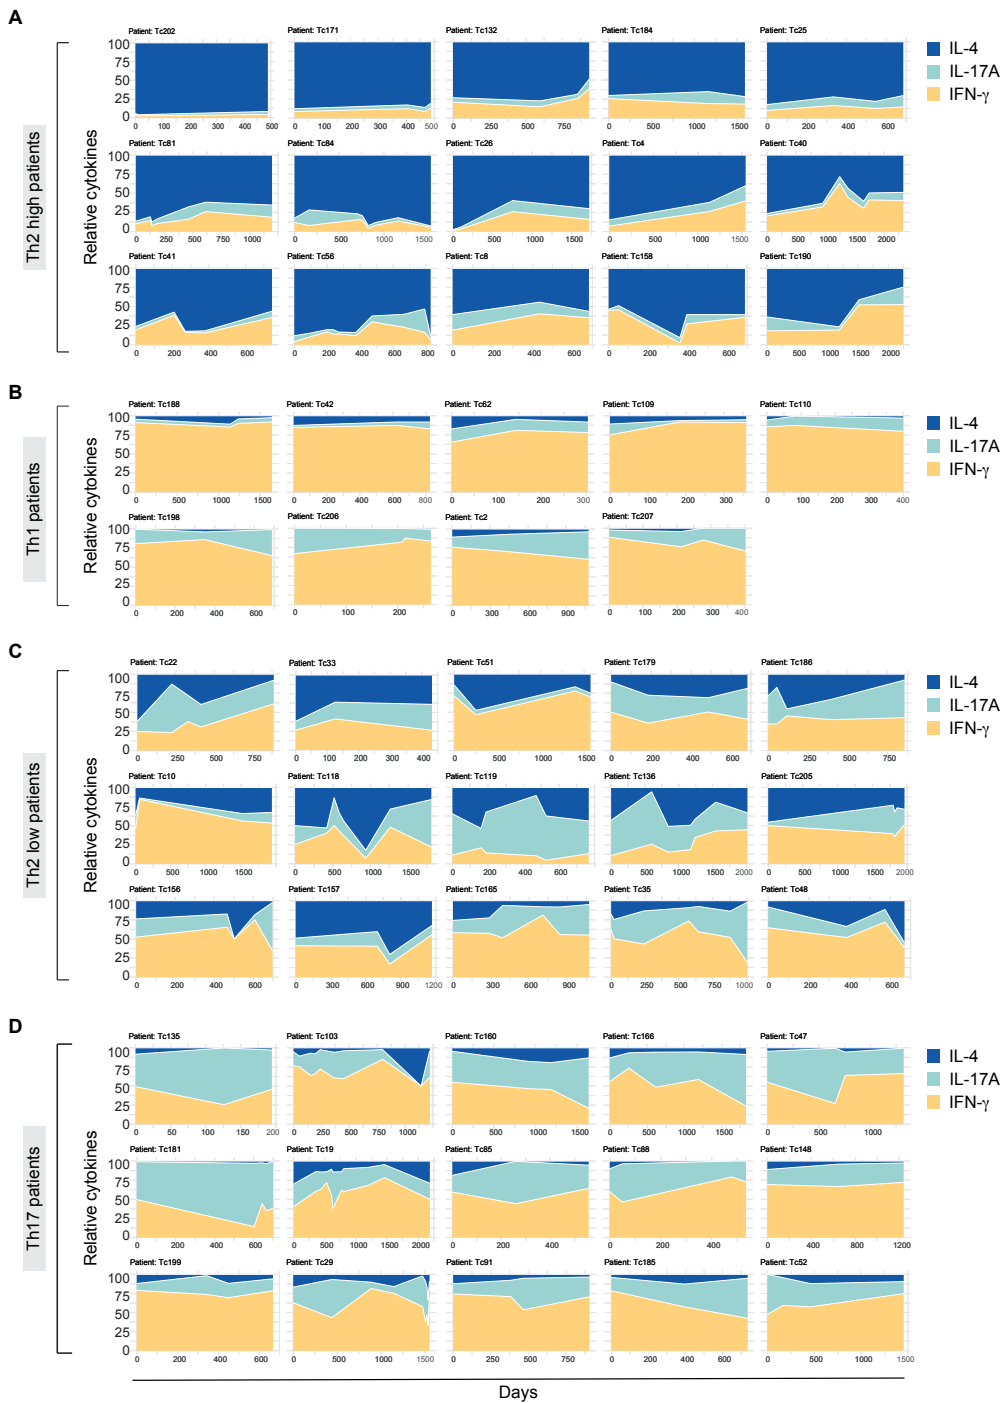

**Figure S3. Stability of different anti-*A. fumigatus* T cell reactivity pattern in pwCF.**

(A-D) Stability of the different *A. fumigatus*-specific cytokine reactivity patterns. *A. fumigatus*-reactive T cells of pwCF were monitored at least three times over a period of up to 5 years. Relative expression of IFN- $\gamma$ , IL-17A and IL-4 within CD154+ Tmem is shown for the different reactivity groups: (A) Th2 high patients; (B) Th1 patients; (C) Th2 low patients; (D) Th17 patients.

## Supplemental Figure 4

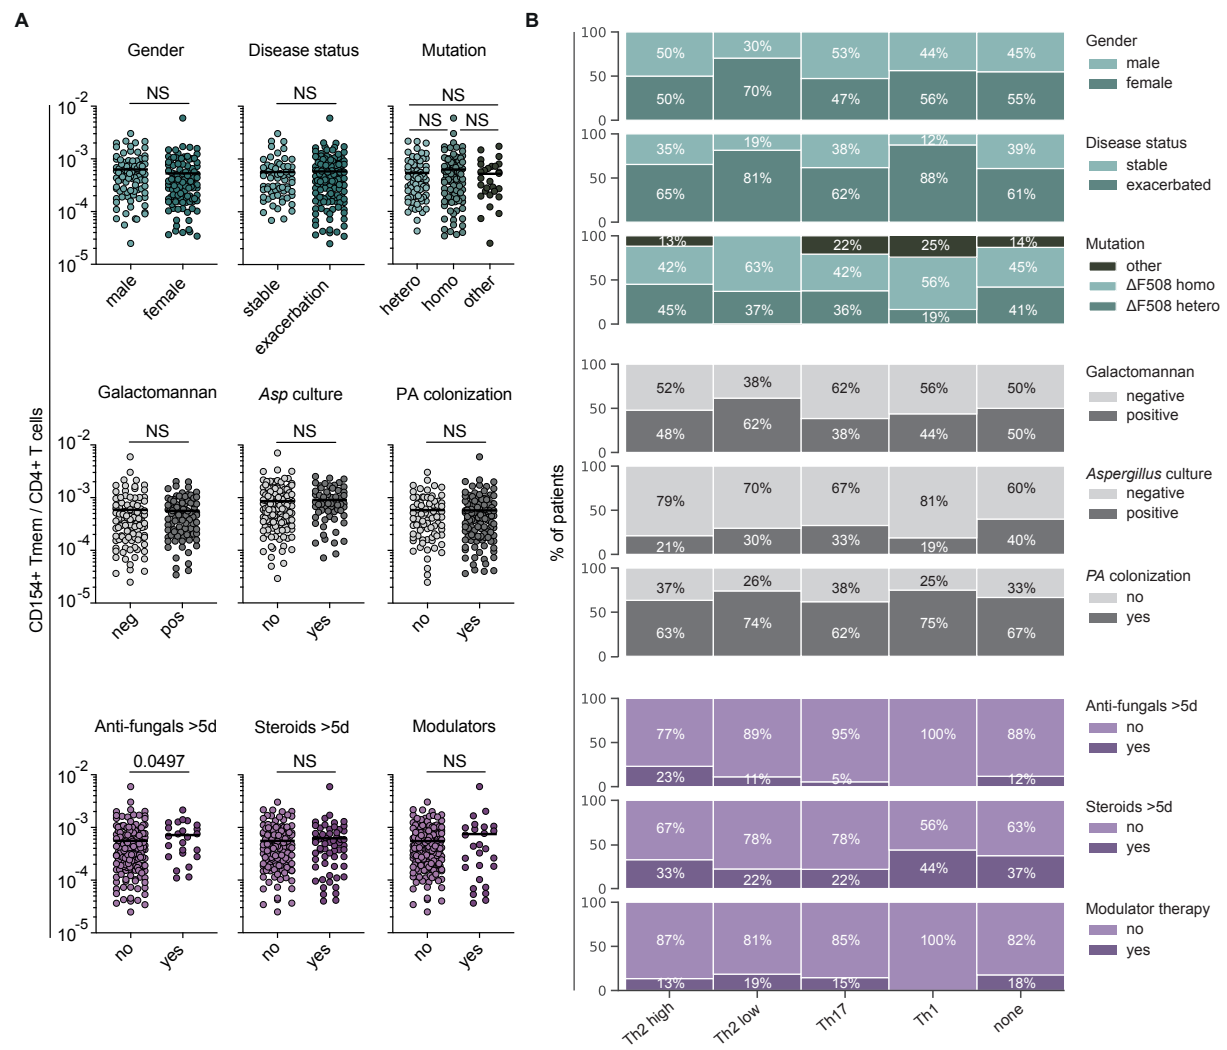

**Figure S4. Correlation of *A. fumigatus*-specific T cell data with clinical parameters.**

**(A)** Frequencies of *A. fumigatus*-reactive Tmem are shown for different patient groups.

**(B)** Distribution of patients according to different clinical parameters within the different T cell reactivity groups. Modulator therapy refers to Ivacaftor single or Ivacaftor/Lumacaftor combination therapy.

Supplemental Figure 5

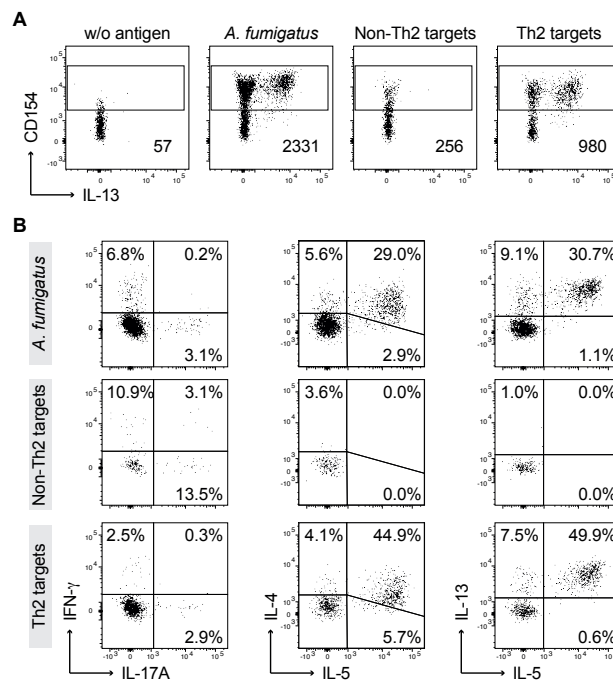

**Figure S5. Different target antigens of *A. fumigatus*-reactive T cell subsets.**

**(A, B)** Ex vivo stimulation of a sensitized CF patient with whole *A. fumigatus* lysate or pooled Th2 target proteins (Aspf2, Aspf3, CpcB, CatB, Fg-gap, GliT) and non-Th2 target proteins (Scw4, Aspf22, Pst1, Shm2, CcpA, TpiA, Crf1, Sod3). **(A)**  $1 \times 10^7$  PBMCs were stimulated or left unstimulated, and cell counts before and after magnetic CD154+ ARTE enrichment are indicated. **(B)** Cells were gated in CD154+ memory cells and percentage of cytokine producers against *A. fumigatus* lysate or the different protein pools are indicated.



**Table S1. Cohort characteristics.**

|                                                     | All CF patients (n=201) | CF “Th2-high” group (n=52) | CF “Th2-low” group (n=27) | CF “Th17” group (n=55) | CF “Th1” group (n=16) | CF “none” group (n=51) | Healthy (n=220) |
|-----------------------------------------------------|-------------------------|----------------------------|---------------------------|------------------------|-----------------------|------------------------|-----------------|
| <b>Age</b> (mean ± SD, years)                       | 29.6 ± 12.7             | 27.7 ± 11.0                | 28.0 ± 13.3               | 26.7 ± 12.0            | 29.9 ± 10.4           | 35.3 ± 13.9            | 35.9 ± 11.3     |
| <b>Gender</b>                                       |                         |                            |                           |                        |                       |                        |                 |
| Male (%)                                            | 46.3                    | 50.0                       | 29.6                      | 52.7                   | 43.8                  | 45.1                   | 44.7            |
| Female (%)                                          | 53.7                    | 50.0                       | 70.4                      | 47.3                   | 56.2                  | 54.9                   | 55.3            |
| <b>BMI kg/m<sup>2</sup></b> (mean ± SD)             | 20.2 ± 3.7              | 20.1 ± 3.6                 | 19.6 ± 3.2                | 20.3 ± 4.3             | 20.7 ± 3.5            | 20.4 ± 3.7             | NA              |
| <b>CRP (mg/l)</b> (mean ± SD)                       | 16.4 ± 24.5             | 15.9 ± 22.9                | 18.9 ± 20.1               | 12.7 ± 20.8            | 17.1 ± 21.7           | 19.6 ± 32.1            | NA              |
| <b>FEV1 % acute</b> (mean ± SD)                     | 56.4 ± 27.6             | 53.1 ± 22.9                | 55.9 ± 29.4               | 62.9 ± 25.9            | 41.0 ± 18.9           | 58.8 ± 32.8            | NA              |
| <b>FVC %</b> (mean ± SD)                            | 72.7 ± 24.8             | 71.6 ± 23.1                | 71.5 ± 26.3               | 78.2 ± 22.0            | 51.8 ± 16.4           | 75.2 ± 27.8            | NA              |
| <b>Total IgE (kU/l)</b> (mean ± SD)                 | 299 ± 676               | 875 ± 1108                 | 163 ± 188                 | 86 ± 176               | 116 ± 298             | 72 ± 171               | NA              |
| <b>A.f. IgE (kU/l)</b> (mean ± SD)                  | 5.5 ± 12.1              | 17.5 ± 18.4                | 4.0 ± 5.9                 | 0.9 ± 2.9              | 0.2 ± 0.2             | 0.6 ± 1.2              | NA              |
| <b>A.f. IgG (mg/l)</b> (mean ± SD)                  | 67.6 ± 44.3             | 80.5 ± 47.7                | 72.2 ± 46.4               | 61.9 ± 42.0            | 60.8 ± 41.8           | 55.2 ± 30.9            | NA              |
| <b>Disease status</b>                               |                         |                            |                           |                        |                       |                        |                 |
| Stable (%)                                          | 32.8                    | 34.6                       | 18.5                      | 38.2                   | 12.5                  | 39.2                   | NA              |
| Exacerbated (%)                                     | 67.2                    | 65.4                       | 81.5                      | 61.8                   | 87.5                  | 60.8                   | NA              |
| <b>Mutation</b>                                     |                         |                            |                           |                        |                       |                        |                 |
| ΔF508 homozygous (%)                                | 46.8                    | 42.3                       | 63.0                      | 41.8                   | 56.2                  | 45.1                   | NA              |
| ΔF508 heterozygous (%)                              | 38.3                    | 44.2                       | 37.0                      | 36.4                   | 18.8                  | 41.2                   | NA              |
| Other (%)                                           | 14.9                    | 13.5                       | 0.0                       | 21.8                   | 25.0                  | 13.7                   | NA              |
| <b>Galactomannan test positive</b> (%)              | 47.4                    | 47.9                       | 61.5                      | 38.8                   | 43.8                  | 50.0                   | NA              |
| <b>Microbiology</b>                                 |                         |                            |                           |                        |                       |                        |                 |
| <i>Aspergillus</i> culture positive (%)             | 30.0                    | 21.2                       | 29.6                      | 32.7                   | 18.8                  | 40.0                   | NA              |
| <i>P. aeruginosa</i> colonization (%)               | 66.2                    | 63.5                       | 74.1                      | 61.8                   | 75.0                  | 66.7                   | NA              |
| Nontuberculous Mycobacteria (%)                     | 8.5                     | 13.5                       | 7.4                       | 7.3                    | 6.3                   | 5.9                    | NA              |
| <b>Comorbidity</b>                                  |                         |                            |                           |                        |                       |                        |                 |
| Pancreas insufficiency (%)                          | 89.5                    | 78.9                       | 92.6                      | 92.7                   | 100                   | 92.2                   | NA              |
| Diabetes (%)                                        | 32.8                    | 36.5                       | 33.3                      | 25.5                   | 37.5                  | 35.3                   | NA              |
| Cystic fibrosis-associated liver disease (CFLD) (%) | 9.9                     | 5.8                        | 18.5                      | 9.1                    | 12.5                  | 9.8                    | NA              |
| Organ Transplantation (%)                           | 5.0                     | 3.9                        | 0                         | 1.8                    | 6.2                   | 11.8                   | NA              |
| <b>Medication</b>                                   |                         |                            |                           |                        |                       |                        |                 |
| Anti-fungal treatment >5 days (%)                   | 11.9                    | 23.1                       | 11.1                      | 5.5                    | 0.0                   | 11.8                   | NA              |
| Steroid treatment >5 days (%)                       | 30.3                    | 32.7                       | 22.2                      | 21.8                   | 43.8                  | 37.3                   | NA              |
| *Modulator therapy (%)                              | 14.4                    | 13.5                       | 81.5                      | 14.5                   | 0.0                   | 17.6                   | NA              |

NA = Not applicable. \*Modulator therapy = Ivacaftor single or Ivacaftor/Lumacaftor combination therapy.



**Table S2.** Results of the sequence similarity searches using NCBI BLAST+ (blastp). *A. fumigatus* protein sequences were compared to the proteome sequence of *S. apiospermum*.

| <b><i>A. fumigatus</i> Af293 protein</b> | Locus-tag    | UniProtKB | Length (aa) | <b><i>S. apiospermum</i></b> | Identifier     | UniProtKB  | Length (aa) | BLAST Score (bits) | Identity (%) | No. of identical /positive AA |
|------------------------------------------|--------------|-----------|-------------|------------------------------|----------------|------------|-------------|--------------------|--------------|-------------------------------|
| CpcB                                     | AFUA_4G13170 | Q4WQK8    | 316         | SAPIO_CDS8541                | XP_016640419.1 | A0A084FZV8 | 316         | 607                | 91           | 289/316                       |
| Aspf22/EnoA                              | AFUA_6G06770 | Q96X30    | 438         | SAPIO_CDS3461                | XP_016644254.1 | A0A084GAU3 | 438         | 781                | 87           | 379/402                       |
| Hsp70                                    | AFUA_1G07440 | Q4WJ30    | 638         | SAPIO_CDS0158                | XP_016646642.1 | A0A084GHN1 | 652         | 954                | 85           | 516/573                       |
| HscA                                     | AFUA_8G03930 | Q4WCM2    | 614         | SAPIO_CDS5518                | XP_016642145.1 | A0A084G4T4 | 614         | 1057               | 84           | 574/614                       |
| Afu3g09320 (Shm2)                        | AFUA_3G09320 | Q4WXF4    | 471         | SAPIO_CDS5029                | XP_016642937.1 | A0A084G726 | 483         | 839                | 84           | 394/468                       |
| Afu5g13450 (TpiA)                        | AFUA_5G13450 | Q4WVV5    | 256         | SAPIO_CDS7740                | XP_016641369.1 | A0A084K2K8 | 248         | 339                | 65           | 162/193                       |
| Sod3/Aspf6                               | AFUA_1G14550 | Q92450    | 210         | SAPIO_CDS6474                | XP_016641856.1 | A0A084G3Z5 | 213         | 255                | 62           | 121/143                       |
| CatB/Cat1                                | AFUA_3G02270 | Q92405    | 728         | SAPIO_CDS2912                | XP_016644600.1 | A0A084GBT9 | 725         | 896                | 61           | 443/537                       |
| Gel1                                     | AFUA_2G01170 | P0C7S9    | 452         | SAPIO_CDS8649                | XP_016640509.1 | A0A084G048 | 443         | 478                | 55           | 252/317                       |
| Aspf2                                    | AFUA_4G09580 | P79017    | 310         | SAPIO_CDS8711                | XP_016640557.1 | A0A084G096 | 253         | 260                | 55           | 126/160                       |
| Aspf3                                    | AFUA_6G02280 | O43099    | 168         | SAPIO_CDS9937                | XP_016639064.1 | A0A084FW03 | 166         | 186                | 54           | 90/116                        |
| Crf1/Aspf9                               | AFUA_1G16190 | Q8J0P4    | 395         | SAPIO_CDS3626                | XP_016644386.1 | A0A084GB75 | 371         | 274                | 46           | 145/197                       |
| GliT                                     | AFUA_6G09740 | E9RAH5    | 334         | SAPIO_CDS10274               | XP_016638733.1 | A0A084FV22 | 592         | 300                | 45           | 142/205                       |
| CsnB                                     | AFUA_4G01290 | Q875I9    | 238         | SAPIO_CDS7894                | XP_016640695.1 | A0A084G0N4 | 287         | 185                | 45           | 106/148                       |
| Scw4                                     | AFUA_6G12380 | Q4WLT6    | 369         | SAPIO_CDS3657                | XP_016644415.1 | A0A084GBA4 | 540         | 134                | 32           | 87/128                        |
| Pst1                                     | AFUA_6G10290 | Q4WMD5    | 405         | SAPIO_CDS7990                | XP_016640635.1 | A0A084G0H4 | 198         | 51                 | 47           | 25/37                         |
| FG-GAP                                   | AFUA_1G04130 | Q4WK08    | 307         | SAPIO_CDS1936                | XP_016645394.1 | A0A084GE33 | 1297        | 80                 | 19           | 42/76                         |
| Afu1g13670 (CcpA)                        | AFUA_1G13670 | E9R0F1    | 260         | SAPIO_CDS9039                | XP_016639840.1 | A0A084FY79 | 579         | 37                 | 15           | 13/28                         |
| Aspf1                                    | AFUA_5G02330 | P67875    | 176         | -                            | -              | -          | -           | -                  | -            | -                             |
| Aspf4                                    | AFUA_2G03830 | O60024    | 322         | -                            | -              | -          | -           | -                  | -            | -                             |
| NadA                                     | AFUA_6G14470 | Q4WL81    | 234         | -                            | -              | -          | -           | -                  | -            | -                             |
| ScwA                                     | AFUA_4G09310 | Q4WPH8    | 183         | -                            | -              | -          | -           | -                  | -            | -                             |

Grey letters indicate no significant similarity and "-" indicates that no orthologue proteins were identified.
